# Supplementary material for: From optical pumping to electrical pumping: the threshold overestimation in metal halide perovskites
Source: Royal Society of Chemistry journal article supplement (doi:10.1039/d2mh01382g), 2023-01-01
Supplement: d2mh01382g1.pdf [file d2mh01382g1.pdf]

## Supporting Information

### **From optical pumping to electrical pumping: the threshold overestimation in metal halide perovskites**

Jiajun Qin,<sup>[a],[b],†</sup> Yang Tang,<sup>[a],†</sup> Jia Zhang,<sup>[b]</sup> Tangyao Shen,<sup>[a]</sup> Max Karlsson,<sup>[b]</sup> Tiankai Zhang,<sup>[b]</sup> Weidong Cai,<sup>[b]</sup> Lei Shi,<sup>\*,[a]</sup> Wei-Xin Ni,<sup>[b]</sup> and Feng Gao,<sup>\*,[b]</sup>

<sup>a</sup> *State Key Laboratory of Surface Physics, Key Laboratory of Micro- and Nano-Photonic Structures (Ministry of Education) and Department of Physics, Fudan University, Shanghai 200433, China.*

<sup>b</sup> *Department of Physics, Chemistry, and Biology (IFM), Linköping University, Linköping SE-58183, Sweden.*

†These authors contributed equally to this work.

*\*Corresponding authors.*

*E-mail addresses: lshi@fudan.edu.cn (L. Shi), feng.gao@liu.se (F. Gao)*

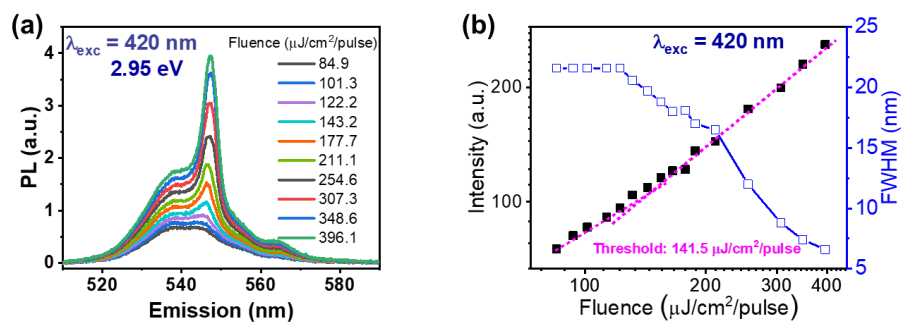

**Fig. S1.** Fluence dependent PL at excitation wavelength of 420 nm. (a) PL spectra and (b) Integrated PL intensity and FWHM at different pump fluences.

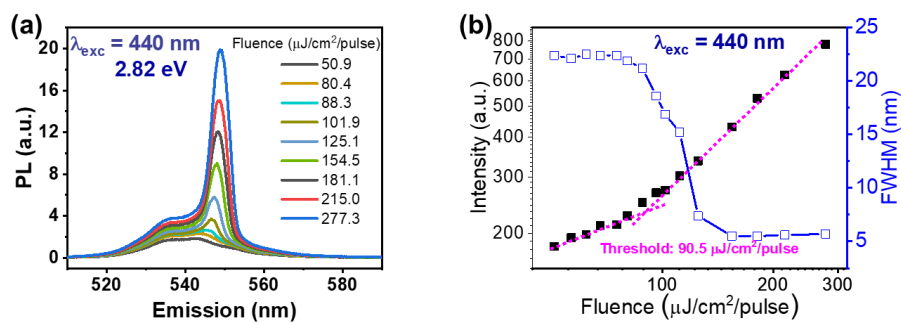

**Fig. S2.** Fluence dependent PL at excitation wavelength of 440 nm. (a) PL spectra and (b) Integrated PL intensity and FWHM at different pump fluences.

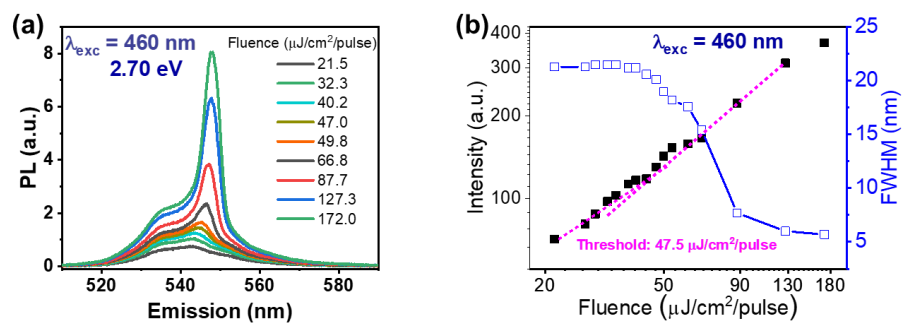

**Fig. S3.** Fluence dependent PL at excitation wavelength of 460 nm. (a) PL spectra and (b) Integrated PL intensity and FWHM at different pump fluences.

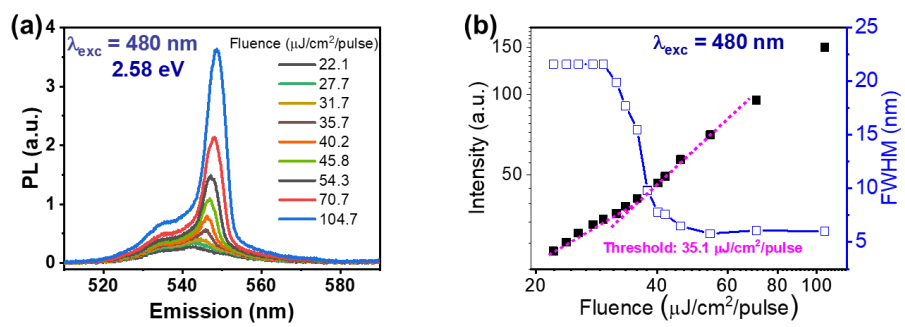

**Fig. S4.** Fluence dependent PL at excitation wavelength of 480 nm. (a) PL spectra and (b) Integrated PL intensity and FWHM at different pump fluences.

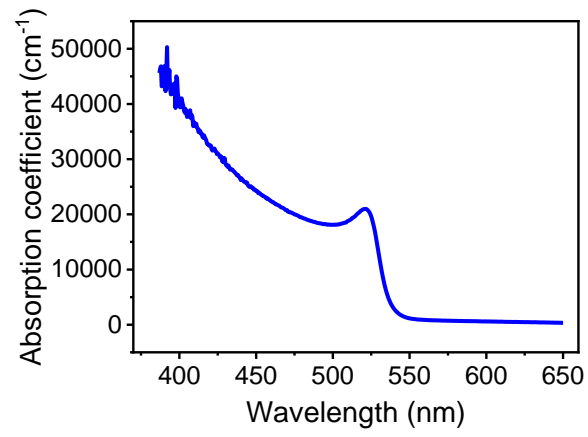

**Fig. S5.** Absorption spectrum of the MAPbBr<sub>3</sub> film.

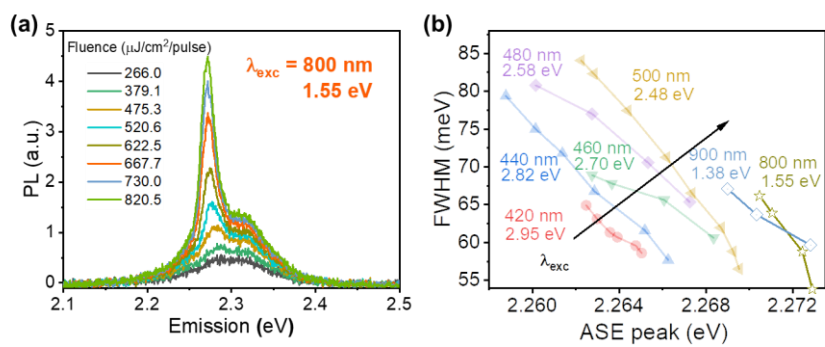

**Fig. S6.** Indication of fast carrier cooling process caused by two-photon up conversion process for MAPbBr<sub>3</sub> film. (a) Fluence dependent PL at excitation wavelength of 800 nm. (b) Comparison of ASE FWHM-ASE peak curves at different excitation photon energies.

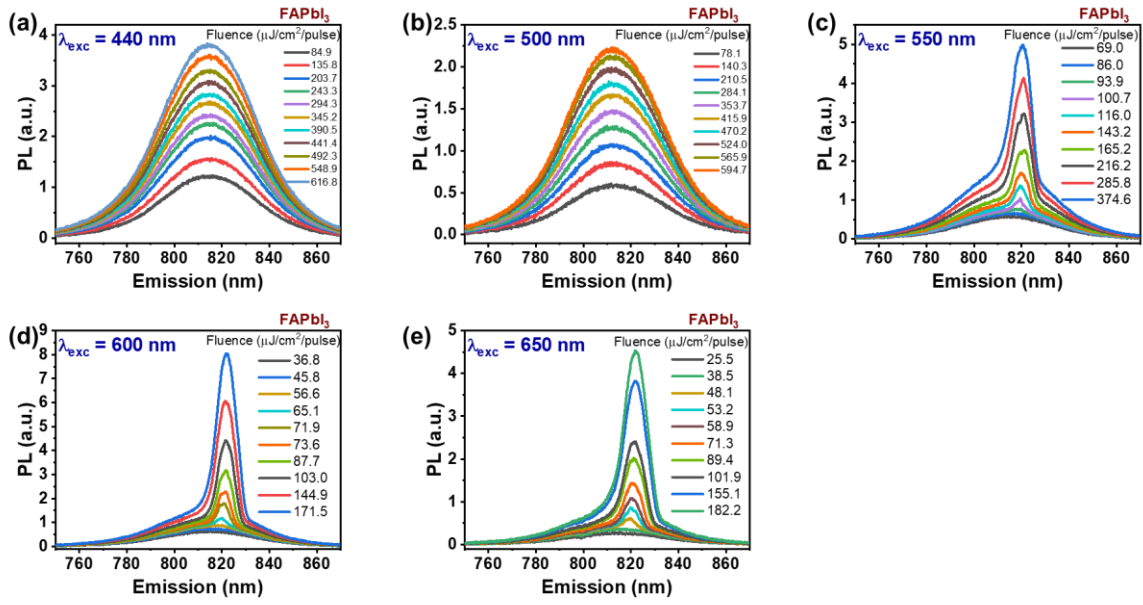

**Fig. S7.** Fluence dependent PL at different excitation wavelengths of FAPbI<sub>3</sub> film. (a) 440 nm. (b) 500 nm. (c) 550 nm. (d) 600 nm. (e) 650 nm.



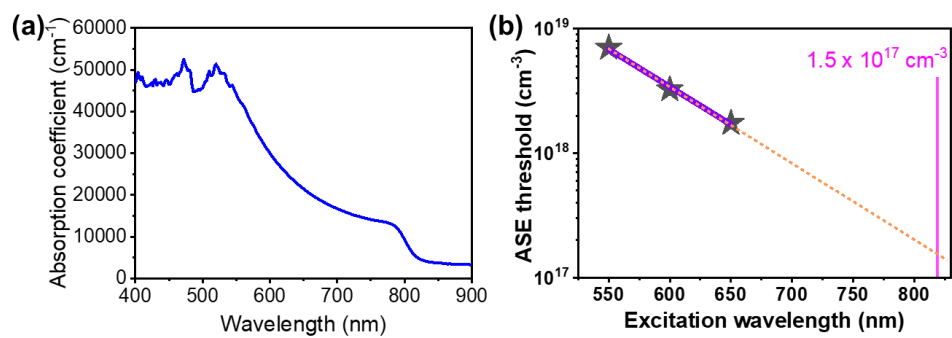

**Fig. S8.** (a) Absorption spectrum of the FAPbI<sub>3</sub> film. (b) Threshold carrier densities at different excitation wavelengths and the extrapolation to the near-to-band-edge photoexcitation wavelength (820 nm).
